# Supplementary material for: Pain and its interference with daily living in relation to cancer: a comparative population-based study of 16,053 cancer survivors and 106,345 people without cancer
Source: Springer Nature journal article supplement (doi:10.1186/s12885-023-11214-5), 2023-09-12
Supplement: MOESM2 [file 26033122]

## ADDITIONAL FILE 2: SUPPLEMENTARY TABLES AND FIGURES

### Contents

|                                                                                                                                      |   |
|--------------------------------------------------------------------------------------------------------------------------------------|---|
| Table S1. ICD-10-AM codes for cancers included in the ‘other cancer’ group .....                                                     | 2 |
| Table S2. Clinical characteristics of cancer by cancer type.....                                                                     | 3 |
| Table S3. Prevalence of bodily pain and high-impact pain by cancer type and time since cancer diagnosis .....                        | 4 |
| Table S4. Prevalence of bodily pain and high-impact pain by cancer type and recent treatment for cancer                              | 5 |
| Table S5. Prevalence of bodily pain and high-impact pain by cancer type and stage .....                                              | 6 |
| Figure S1. Prevalence of bodily pain in cancer survivors versus individuals without cancer, in a range of population subgroups ..... | 7 |

**Table S1. ICD-10-AM codes for cancers included in the ‘other cancer’ group**

| ICD10 Code | Label                                                                                                                    | n    |
|------------|--------------------------------------------------------------------------------------------------------------------------|------|
| C00-C14    | Malignant neoplasms of lip, oral cavity and pharynx                                                                      | 332  |
| C15-C26    | Malignant neoplasms of digestive organs C16, C17, C21-C26                                                                | 292  |
| C30-C39    | Malignant neoplasms of respiratory and intrathoracic organs C30-C32, C37                                                 | 83   |
| C40-C41    | Malignant neoplasms of bone and articular cartilage                                                                      | 16   |
| C42        | Vacant category to designate topography sites                                                                            | 4    |
| C45-C49    | Malignant neoplasms of mesothelial and soft tissue                                                                       | 93   |
| C51-C58    | Malignant neoplasms of female genital organs C51-C53, C56-C58                                                            | 214  |
| C60-C63    | Malignant neoplasms of male genital organs C60, C62, C63                                                                 | 48   |
| C64-C68    | Malignant neoplasms of urinary tract C65, C66                                                                            | 37   |
| C69-C72    | Malignant neoplasms of eye, brain and other parts of central nervous system                                              | 79   |
| C73-C75    | Malignant neoplasms of thyroid and other endocrine glands C74, C75                                                       | 10   |
| C76-C80    | Malignant neoplasms of ill-defined, secondary and unspecified sites C76, C80                                             | 76   |
| C81-C96    | Malignant neoplasms, stated or presumed to be primary, of lymphoid, haematopoietic and related tissue C81, C88, C90, C96 | 62   |
| D37-D48    | Neoplasms of uncertain or unknown behaviour                                                                              | 135  |
| Total      |                                                                                                                          | 1481 |

ICD-10-AM: International Statistical Classification of Diseases and Related Health Problems, Tenth Revision, Australian Modification.

In analyses by cancer type, cancers were classified as breast (ICD-10-AM diagnosis code C50, women only), prostate (C61, men only), lung (C33–C34), melanoma (C43), colorectal (C18–C20), non-Hodgkin’s lymphoma (C82–C86), kidney (C64), oesophagus (C15), uterus (C54–C55, women only), bladder (C67), thyroid (C73), leukaemia (C91–C95), multiple myeloma (C90.0) and ‘other cancers’.

**Table S2. Clinical characteristics of cancer by cancer type**

|                                                              | Prostate | Breast | Melanoma | Colorectal | NHL  | Lung | Kidney | Uterus | Bladder | Leukaemia | Thyroid | Multiple myeloma | Oesophagus | Other cancer | Any cancer |
|--------------------------------------------------------------|----------|--------|----------|------------|------|------|--------|--------|---------|-----------|---------|------------------|------------|--------------|------------|
| <b>n</b>                                                     | 4577     | 3118   | 2526     | 1847       | 607  | 272  | 327    | 350    | 206     | 270       | 284     | 130              | 58         | 1481         | 16053      |
| <b>Median time since diagnosis (years)</b>                   | 5.6      | 7.3    | 6.4      | 6.0        | 5.2  | 2.8  | 5.6    | 6.2    | 5.4     | 4.9       | 5.5     | 3.3              | 2.3        | 5.3          | 5.9        |
| <b>Time since diagnosis (years), %</b>                       |          |        |          |            |      |      |        |        |         |           |         |                  |            |              |            |
| <1                                                           | 8.7      | 6.7    | 10.2     | 8.1        | 11.7 | 24.3 | 11.9   | 11.7   | 13.6    | 11.5      | 9.9     | 13.1             | 25.9       | 13.8         | 9.7        |
| 1 to <2                                                      | 9.1      | 7.4    | 8.4      | 8.9        | 11.0 | 14.3 | 8.0    | 7.1    | 10.2    | 11.9      | 10.9    | 17.7             | 17.2       | 10.8         | 9.1        |
| 2 to <5                                                      | 27.0     | 21.1   | 23.2     | 24.7       | 26.4 | 24.6 | 25.4   | 24.6   | 23.3    | 27.4      | 25.0    | 34.6             | 19.0       | 22.7         | 24.4       |
| 5 to <10                                                     | 35.4     | 30.4   | 28.3     | 32.4       | 28.3 | 23.9 | 29.7   | 30.0   | 23.8    | 25.6      | 32.4    | 23.8             | 22.4       | 28.6         | 31.1       |
| 10 or more                                                   | 19.8     | 34.3   | 30.0     | 25.8       | 22.6 | 12.9 | 25.1   | 26.6   | 29.1    | 23.7      | 21.8    | 10.8             | 15.5       | 24.1         | 25.7       |
| <b>Stage, %</b>                                              |          |        |          |            |      |      |        |        |         |           |         |                  |            |              |            |
| Localised to tissue of origin                                | 58.4     | 59.2   | 90.0     | 43.2       | N/A  | 54.0 | 76.8   | 69.4   | 51.0    | N/A       | 70.8    | N/A              | 55.2       | 37.5         | 56.8       |
| Regional spread, adjacent organs and/or regional lymph nodes | 10.7     | 34.7   | 4.8      | 44.3       | N/A  | 25.0 | 13.5   | 19.7   | 15.0    | N/A       | 15.5    | N/A              | 20.7       | 22.5         | 19.4       |
| Distant metastases                                           | 0.6      | 2.6    | 1.2      | 4.2        | N/A  | 11.8 | 1.8    | 3.1    | 1.0     | N/A       | 1.4     | N/A              | 3.4        | 9.0          | 2.5        |
| Unknown                                                      | 30.3     | 3.5    | 4.0      | 8.3        | N/A  | 9.2  | 8.0    | 7.7    | 33.0    | N/A       | 12.3    | N/A              | 20.7       | 31.0         | 21.2       |
| <b>Treatment for any cancer in the past month, %</b>         | 13.9     | 22.2   | 8.0      | 14.3       | 19.6 | 29.8 | 11.3   | 12.3   | 21.8    | 21.9      | 9.5     | 56.9             | 25.9       | 18.6         | 16.0       |

Cancer staging is applicable to solid tumours only and is not relevant for non-Hodgkin's lymphoma (NHL), leukaemia, or multiple myeloma.

Percentages are out of column totals.

Breast and uterus cancer survivors include women only. There were 16 men with breast cancer. They are not reflected in breast cancer or 'other cancer' categories. Prostate cancer survivors include men only.

Diagnosis codes grouped under 'other cancers' and the corresponding numbers of participants, are included in Supplementary Table 1.

There were 1,260 participants without a record of cancer in the cancer registry, who self-reported that they received treatment for cancer in the last month; they have been retained in the 'no cancer' group and are not reflected in participants receiving cancer treatment.

**Table S3. Prevalence of bodily pain and high-impact pain by cancer type and time since cancer diagnosis**

| Cancer type         | Time since diagnosis <2 years |                  |                        |                  | Time since diagnosis 2 or more years |                  |                        |                  |
|---------------------|-------------------------------|------------------|------------------------|------------------|--------------------------------------|------------------|------------------------|------------------|
|                     | Bodily pain                   |                  | High-impact pain       |                  | Bodily pain                          |                  | High-impact pain       |                  |
|                     | % (n/N)                       | PR (95% CI)      | % (n/N)                | PR (95% CI)      | % (n/N)                              | PR (95% CI)      | % (n/N)                | PR (95% CI)      |
| Multiple myeloma    | 60.0 (24/40)                  | 1.81 (1.40-2.33) | 40 (16/40)             | 2.77 (1.89-4.07) | 47.7 (42/88)                         | 1.51 (1.21-1.88) | 26.4 (23/87)           | 1.96 (1.37-2.79) |
| Lung                | 51.0 (51/100)                 | 1.57 (1.29-1.91) | 29.1 (30/103)          | 2.08 (1.53-2.83) | 47.2 (76/161)                        | 1.39 (1.18-1.64) | 25.8 (41/159)          | 1.74 (1.33-2.27) |
| Leukaemia           | 41.9 (26/62)                  | 1.28 (0.95-1.72) | 19.7 (12/61)           | 1.38 (0.83-2.31) | 40.2 (80/199)                        | 1.27 (1.07-1.51) | 18.7 (37/198)          | 1.38 (1.03-1.85) |
| Thyroid             | 35.6 (21/59)                  | 1.10 (0.78-1.55) | --                     | --               | 42.9 (93/217)                        | 1.32 (1.13-1.54) | 24.9 (54/217)          | 1.83 (1.45-2.31) |
| Kidney              | 35.4 (23/65)                  | 1.13 (0.81-1.56) | 20 (13/65)             | 1.49 (0.92-2.43) | 36.4 (90/247)                        | 1.12 (0.95-1.33) | 17.7 (44/248)          | 1.27 (0.97-1.66) |
| Uterus (women only) | 48.4 (30/62)                  | 1.35 (1.04-1.75) | 29 (18/62)             | 1.87 (1.26-2.78) | 39.5 (109/276)                       | 1.08 (0.93-1.25) | 21.1 (58/275)          | 1.32 (1.05-1.66) |
| Bladder             | 52.1 (25/48)                  | 1.61 (1.22-2.13) | 20.8 (10/48)           | 1.46 (0.82-2.60) | 32 (48/150)                          | 0.96 (0.76-1.21) | 17.2 (26/151)          | 1.15 (0.81-1.63) |
| Breast (women only) | 38.3 (165/431)                | 1.11 (0.98-1.25) | 17.9 (77/431)          | 1.22 (1.00-1.50) | 36.9 (958/2593)                      | 1.05 (1.00-1.11) | 15.6 (405/2601)        | 1.04 (0.95-1.14) |
| Prostate (men only) | 28.4 (226/796)                | 0.99 (0.88-1.10) | 11.1 (88/794)          | 0.92 (0.75-1.12) | 31.9 (1168/3657)                     | 1.07 (1.02-1.13) | 13.7 (501/3653)        | 1.07 (0.98-1.17) |
| Oesophagus          | 41.7 (10/24)                  | 1.30 (0.82-2.07) | --                     | --               | --                                   | --               | --                     | --               |
| Colorectal          | 31.9 (99/310)                 | 0.95 (0.81-1.12) | 15 (46/306)            | 1.02 (0.78-1.33) | 35.7 (526/1473)                      | 1.04 (0.97-1.12) | 16 (235/1470)          | 1.06 (0.94-1.19) |
| Melanoma            | 32.9 (149/453)                | 1.03 (0.90-1.17) | 14.9 (68/455)          | 1.09 (0.88-1.36) | 32.7 (654/1999)                      | 1.01 (0.95-1.07) | 13.9 (277/1988)        | 1.00 (0.89-1.11) |
| NHL                 | 33.3 (45/135)                 | 1.04 (0.82-1.32) | 18.4 (25/136)          | 1.33 (0.94-1.90) | 33 (149/452)                         | 0.99 (0.86-1.12) | 16.7 (75/450)          | 1.15 (0.93-1.41) |
| Other cancer        | 44.3 (153/345)                | 1.35 (1.20-1.52) | 24.3 (84/345)          | 1.71 (1.42-2.06) | 35.4 (382/1080)                      | 1.09 (1.01-1.19) | 16.7 (180/1076)        | 1.21 (1.06-1.38) |
| Any cancer          | 35.7 (1048/2934)              | 1.12 (1.07-1.18) | 17.1 (503/2933)        | 1.26 (1.16-1.37) | 34.7 (4388/12636)                    | 1.06 (1.04-1.09) | 15.6 (1965/12617)      | 1.11 (1.06-1.16) |
| No cancer           | 31.3<br>(32471/103604)        | 1.00             | 13.1<br>(13573/103623) | 1.00             | 31.3<br>(32471/103604)               | 1.00             | 13.1<br>(13573/103623) | 1.00             |

CI: confidence interval; NHL: non-Hodgkin's lymphoma; PR: prevalence ratio.

Regression models estimated age- and sex- adjusted PRs for each cancer type and clinical characteristic separately. Clinical characteristics categories with at least 10 participants with the outcome of interest were included in the corresponding regression model.

**Table S4. Prevalence of bodily pain and high-impact pain by cancer type and recent treatment for cancer**

| Cancer type         | Recent treatment for cancer |                  |                        |                  | No recent treatment for cancer |                  |                        |                  |
|---------------------|-----------------------------|------------------|------------------------|------------------|--------------------------------|------------------|------------------------|------------------|
|                     | Bodily pain                 |                  | High-impact pain       |                  | Bodily pain                    |                  | High-impact pain       |                  |
|                     | % (n/N)                     | PR (95% CI)      | % (n/N)                | PR (95% CI)      | % (n/N)                        | PR (95% CI)      | % (n/N)                | PR (95% CI)      |
| Multiple myeloma    | 61.6 (45/73)                | 1.93 (1.61-2.32) | 39.7 (29/73)           | 2.91 (2.20-3.85) | 38.2 (21/55)                   | 1.18 (0.84-1.65) | 18.5 (10/54)           | 1.32 (0.75-2.33) |
| Lung                | 55.8 (43/77)                | 1.75 (1.43-2.15) | 34.6 (27/78)           | 2.53 (1.85-3.46) | 45.4 (83/183)                  | 1.33 (1.14-1.57) | 24 (44/183)            | 1.62 (1.25-2.10) |
| Leukaemia           | 41.4 (24/58)                | 1.31 (0.96-1.79) | 19 (11/58)             | 1.41 (0.82-2.44) | 39.8 (80/201)                  | 1.24 (1.05-1.47) | 18.1 (36/199)          | 1.31 (0.98-1.77) |
| Thyroid             | 70.4 (19/27)                | 2.18 (1.68-2.83) | 46.2 (12/26)           | 3.37 (2.18-5.21) | 38.2 (95/249)                  | 1.17 (1.00-1.37) | 20.1 (50/249)          | 1.48 (1.15-1.90) |
| Kidney              | 45.9 (17/37)                | 1.43 (1.01-2.02) | 16.2 (6/37)            | --               | 34.2 (92/269)                  | 1.06 (0.90-1.25) | 18.2 (49/269)          | 1.31 (1.02-1.69) |
| Uterus (women only) | 47.6 (20/42)                | 1.29 (0.94-1.76) | 35.7 (15/42)           | 2.20 (1.46-3.30) | 40.1 (118/294)                 | 1.10 (0.96-1.27) | 20.8 (61/293)          | 1.31 (1.05-1.64) |
| Bladder             | 48.8 (21/43)                | 1.46 (1.07-2.00) | 27.9 (12/43)           | 1.88 (1.15-3.07) | 33.8 (52/154)                  | 1.02 (0.81-1.27) | 15.5 (24/155)          | 1.04 (0.72-1.51) |
| Breast (women only) | 44.4 (295/665)              | 1.29 (1.18-1.41) | 20.7 (139/673)         | 1.42 (1.22-1.64) | 35.1 (827/2356)                | 1.00 (0.94-1.06) | 14.6 (343/2356)        | 0.97 (0.87-1.07) |
| Prostate (men only) | 41.1 (255/621)              | 1.37 (1.25-1.51) | 21 (131/623)           | 1.63 (1.40-1.91) | 29.6 (1115/3770)               | 1.00 (0.95-1.05) | 12 (450/3763)          | 0.95 (0.86-1.04) |
| Oesophagus          | --                          | --               | --                     | --               | 31.7 (13/41)                   | 0.99 (0.63-1.57) | --                     | --               |
| Colorectal          | 42.4 (109/257)              | 1.26 (1.09-1.46) | 25.1 (64/255)          | 1.71 (1.38-2.11) | 33.6 (508/1511)                | 0.98 (0.92-1.06) | 14.3 (215/1506)        | 0.95 (0.84-1.07) |
| Melanoma            | 41.7 (80/192)               | 1.28 (1.08-1.52) | 22.8 (44/193)          | 1.61 (1.24-2.09) | 31.9 (716/2243)                | 0.99 (0.93-1.05) | 13.3 (297/2234)        | 0.96 (0.86-1.06) |
| NHL                 | 41.7 (48/115)               | 1.28 (1.03-1.59) | 20.7 (24/116)          | 1.46 (1.02-2.09) | 31 (146/471)                   | 0.93 (0.81-1.07) | 16.2 (76/469)          | 1.12 (0.92-1.38) |
| Other cancer        | 49.1 (131/267)              | 1.50 (1.33-1.70) | 30.2 (81/268)          | 2.14 (1.78-2.58) | 35 (401/1146)                  | 1.08 (1.00-1.17) | 16 (183/1141)          | 1.15 (1.01-1.32) |
| Any cancer          | 44.7<br>(1113/2490)         | 1.37 (1.31-1.43) | 24 (600/2502)          | 1.71 (1.59-1.83) | 33 (4271/12957)                | 1.01 (0.99-1.04) | 14.3 (1849/12926)      | 1.02 (0.98-1.07) |
| No cancer           | 31.4<br>(32301/102927)      | 1                | 13.1<br>(13494/102948) | 1                | 31.4<br>(32301/102927)         | 1                | 13.1<br>(13494/102948) | 1                |

CI: confidence interval; NHL: non-Hodgkin's lymphoma; PR: prevalence ratio.

Regression models estimated age- and sex- adjusted PRs for each cancer type and clinical characteristic separately. Clinical characteristics categories with at least 10 participants with the outcome of interest were included in the corresponding regression model.

**Table S5. Prevalence of bodily pain and high-impact pain by cancer type and stage**

| Cancer type         | Localised/regional cancer |                  |                        |                  | Distant metastasis     |                  |                        |                  |
|---------------------|---------------------------|------------------|------------------------|------------------|------------------------|------------------|------------------------|------------------|
|                     | Bodily pain               |                  | High-impact pain       |                  | Bodily pain            |                  | High-impact pain       |                  |
|                     | % (n/N)                   | PR (95% CI)      | % (n/N)                | PR (95% CI)      | % (n/N)                | PR (95% CI)      | % (n/N)                | PR (95% CI)      |
| Lung                | 47.8 (99/207)             | 1.43 (1.24-1.66) | 26.1 (54/207)          | 1.80 (1.42-2.27) | 60 (18/30)             | 1.85 (1.36-2.52) | 35.5 (11/31)           | 2.55 (1.54-4.22) |
| Thyroid             | 41.4 (98/237)             | 1.28 (1.10-1.49) | 23.2 (55/237)          | 1.71 (1.36-2.17) | --                     | --               | 75 (3/4)               | --               |
| Kidney              | 34.4 (97/282)             | 1.07 (0.91-1.25) | 17 (48/283)            | 1.22 (0.94-1.58) | --                     | --               | 33.3 (2/6)             | --               |
| Uterus (women only) | 42.7 (129/302)            | 1.17 (1.03-1.34) | 23.3 (70/301)          | 1.46 (1.19-1.80) | 18.2 (2/11)            | --               | 27.3 (3/11)            | --               |
| Bladder             | 35.7 (46/129)             | 1.08 (0.86-1.36) | 15.3 (20/131)          | 1.04 (0.69-1.56) | --                     | --               | --                     | --               |
| Breast (women only) | 36.9 (1048/2842)          | 1.06 (1.01-1.11) | 15.5 (442/2851)        | 1.04 (0.95-1.14) | 48.7 (37/76)           | 1.41 (1.12-1.79) | 26 (20/77)             | 1.77 (1.21-2.59) |
| Prostate (men only) | 30.4 (937/3084)           | 1.04 (0.98-1.10) | 12.6 (390/3084)        | 1.01 (0.92-1.12) | 46.2 (12/26)           | 1.52 (1.01-2.28) | 8.3 (2/24)             | --               |
| Oesophagus          | 32.6 (14/43)              | 1.01 (0.65-1.56) | --                     | --               | --                     | --               | --                     | --               |
| Colorectal          | 35.7 (557/1560)           | 1.04 (0.98-1.12) | 16.2 (252/1553)        | 1.07 (0.96-1.20) | 32 (24/75)             | 0.98 (0.70-1.37) | 17.6 (13/74)           | 1.25 (0.76-2.05) |
| Melanoma            | 32.7 (761/2324)           | 1.01 (0.95-1.07) | 14.2 (329/2314)        | 1.02 (0.92-1.13) | 33.3 (10/30)           | 1.02 (0.61-1.72) | 19.4 (6/31)            | --               |
| Other cancer        | 36.4 (312/858)            | 1.13 (1.03-1.23) | 17.2 (147/854)         | 1.25 (1.08-1.45) | 43 (55/128)            | 1.31 (1.08-1.60) | 19.7 (25/127)          | 1.41 (0.99-2.00) |
| Any cancer          | 34.5 (4103/11882)         | 1.06 (1.03-1.09) | 15.3 (1820/11873)      | 1.10 (1.05-1.15) | 41.9 (164/391)         | 1.27 (1.13-1.43) | 21.8 (85/390)          | 1.54 (1.28-1.87) |
| No cancer           | 31.3<br>(32471/103604)    | 1                | 13.1<br>(13573/103623) | 1                | 31.3<br>(32471/103604) | 1                | 13.1<br>(13573/103623) | 1                |

CI: confidence interval; PR: prevalence ratio.

Cancer staging is applicable to solid tumours only and is not relevant for non-Hodgkin's lymphoma, leukaemia, or multiple myeloma.

Regression models estimated age- and sex- adjusted PRs for each cancer type and clinical characteristic separately. Clinical characteristics categories with at least 10 participants with the outcome of interest were included in the corresponding regression model.

**Figure S1. Prevalence of bodily pain in cancer survivors versus individuals without cancer, in a range of population subgroups**

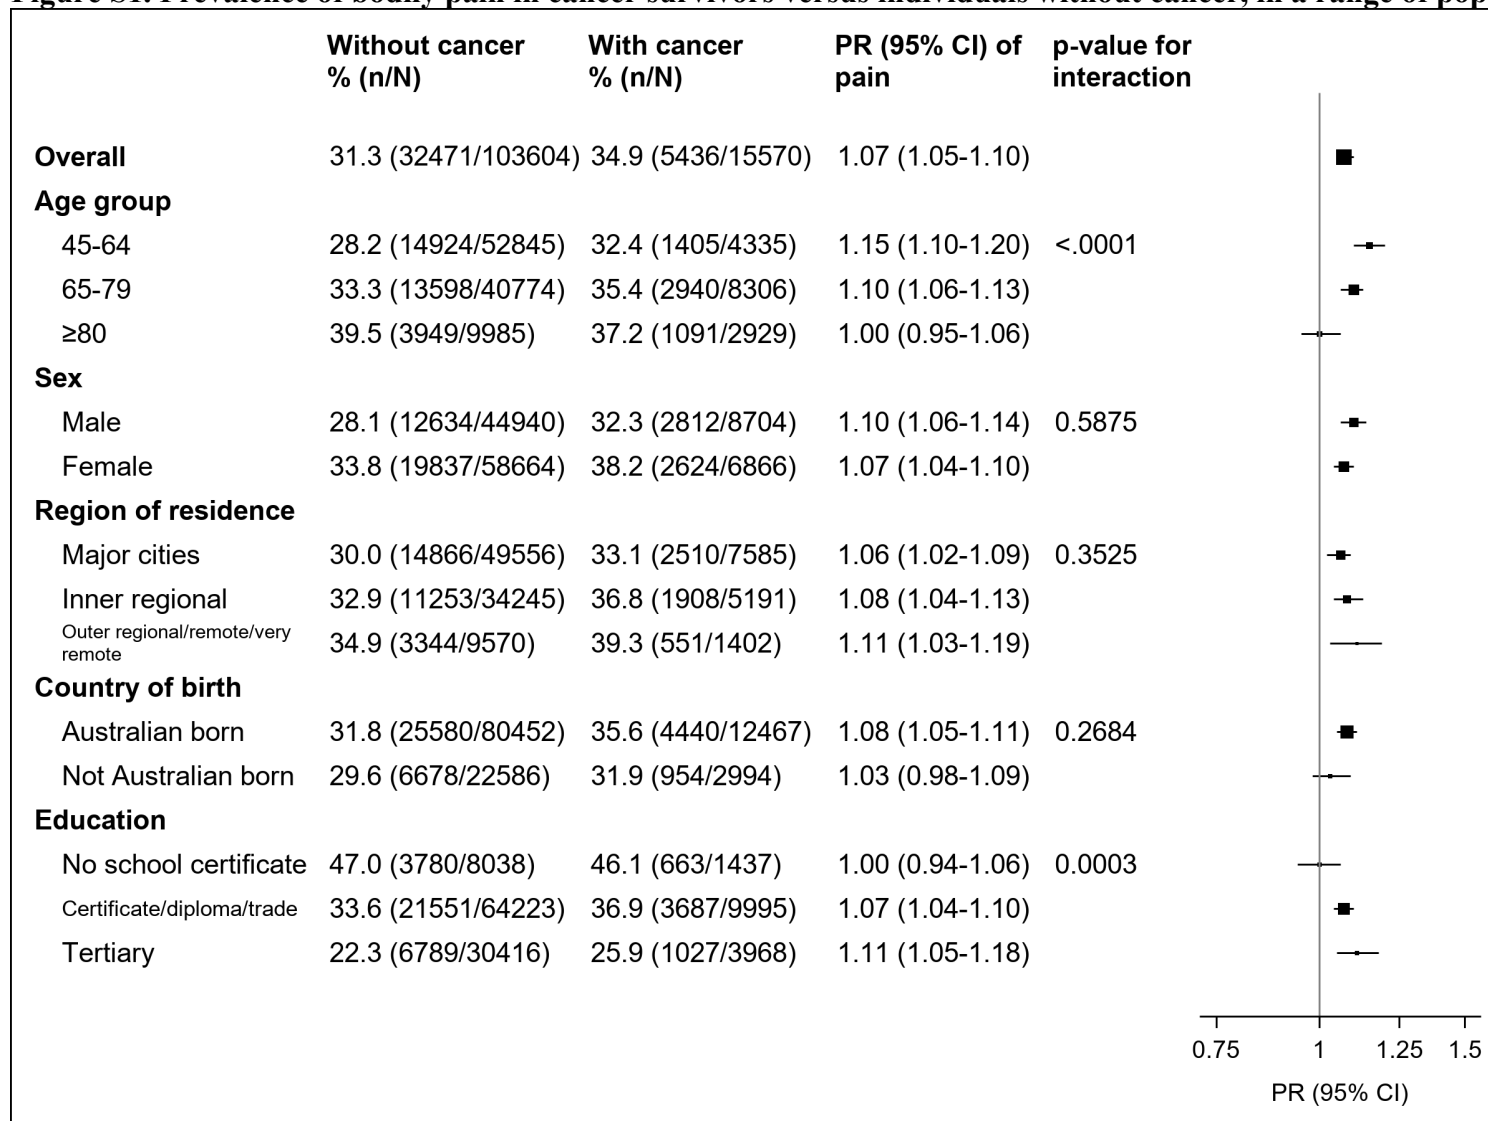

CI: confidence interval; PR: prevalence ratio.
